# Supplementary material for: Male water striders attract predators to intimidate females into copulation
Source: PubMed Central journal article supplement — Nat Commun. 2010 Aug;1(5):1–6. doi: 10.1038/ncomms1051 (PMC2964456; doi:10.1038/ncomms1051), 2010-08
Supplement: ncomms1051-s1.pdf [file ncomms1051-s1.pdf]

## Supplementary Information

# Male water striders attract predators to intimidate females into copulation

Chang S. Han & Piotr G. Jablonski

### Supplementary Table S1

Results of nonparametric ANOVA and parametric two-way repeated measures ANOVA.

|                          | <i>The number of tapping movements</i> | <i>Latency until female genitalia protrusion</i> | <i>Resistance proportion</i>    |
|--------------------------|----------------------------------------|--------------------------------------------------|---------------------------------|
| <i>Friedman ANOVA</i>    | $\chi^2=20.69$ , df=3, $P<0.001$       | $\chi^2=22.63$ , df=3, $P<0.001$                 | $\chi^2=11.06$ , df=3, $P=0.01$ |
| <i>Parametric ANOVA:</i> |                                        |                                                  |                                 |
| <i>Predator</i>          | F(1,26)=6.22; $P=0.02$                 | F(1,26)=8.36; $P=0.007$                          | F(1,26)=13.87; $P<0.001$        |
| <i>Bar</i>               | F(1,26)=25.33; $P<0.001$               | F(1,26)=31.98; $P<0.001$                         | F(1,26)=2.06; $P=0.16$          |
| <i>Predator*Bar</i>      | F(1,26)=1.91; $P=0.18$                 | F(1,26)=0.25; $P=0.62$                           | F(1,26)=2.12; $P=0.16$          |
